# Supplementary material for: Hemispheric differences in ozone across the stratosphere–troposphere exchange region
Source: Copernicus journal article supplement (doi:10.5194/acp-25-8553-2025), 2025-08-07
Supplement: Supplementary file 1 [file acp-25-8553-2025-supplement.pdf]

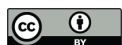

*Supplement of*

## **Hemispheric differences in ozone across the stratosphere–troposphere exchange region**

**Rodrigo J. Seguel et al.**

*Correspondence to:* Rodrigo J. Seguel ([rodrigoseguel@uchile.cl](mailto:rodrigoseguel@uchile.cl))

The copyright of individual parts of the supplement might differ from the article licence.

## List of contents

**Figure S1:** Routes position frequency obtained from aircraft GPSs. All panels show only SouthTRAC and IAGOS data within the same latitudinal band 45°-60° in the SH and NH. The upper panel shows the number of GPS observations by grid cell (5° x 5°) between 300 and 700 hPa. The lower panels show the same information between 700 and 300 hPa.

**Figure S2:** Ozone box plot ( $\text{nmol mol}^{-1}$ ) and associated sample sizes by pressure bins. The plots include ozone data with RH less than 30% obtained from IAGOS, SouthTRAC and WOUDC. In the upper panel, the left, middle and right plots show the entire period, late winter-early spring and mid-spring respectively, for the northern and southern hemispheres and high-depleted (HD) and low-depleted (LD) years. Box plots indicate the median, the 25<sup>th</sup> and 75<sup>th</sup> percentiles. The diamonds in the upper panels indicate the mean values. The whiskers extend to the 5<sup>th</sup> and 95<sup>th</sup> percentiles. In the lower panels, the X-axis shows the observation numbers. The rest of the plot information is the same as described in the upper panel. High and low-depletion years in SH included ozonesondes launched from Ushuaia, Lauder and Macquarie Island.

**Figure S3:** Ozone box plot ( $\text{nmol mol}^{-1}$ ) and associated sample sizes by pressure bins. The plots include ozone data with RH less than 10% obtained from IAGOS, SouthTRAC and WOUDC. In the upper panel, the left, middle and right plots show the entire period, late winter-early spring and mid-spring respectively, for the northern and southern hemispheres and high-depleted (HD) and low-depleted (LD) years. Box plots indicate the median, the 25<sup>th</sup> and 75<sup>th</sup> percentiles. The diamonds in the upper panels indicate the mean values. The whiskers extend to the 5<sup>th</sup> and 95<sup>th</sup> percentiles. In the lower panels, the X-axis shows the observation numbers. The rest of the plot information is the same as described in the upper panel. High and low-depletion years in SH included ozonesondes launched from Ushuaia, Lauder and Macquarie Island.

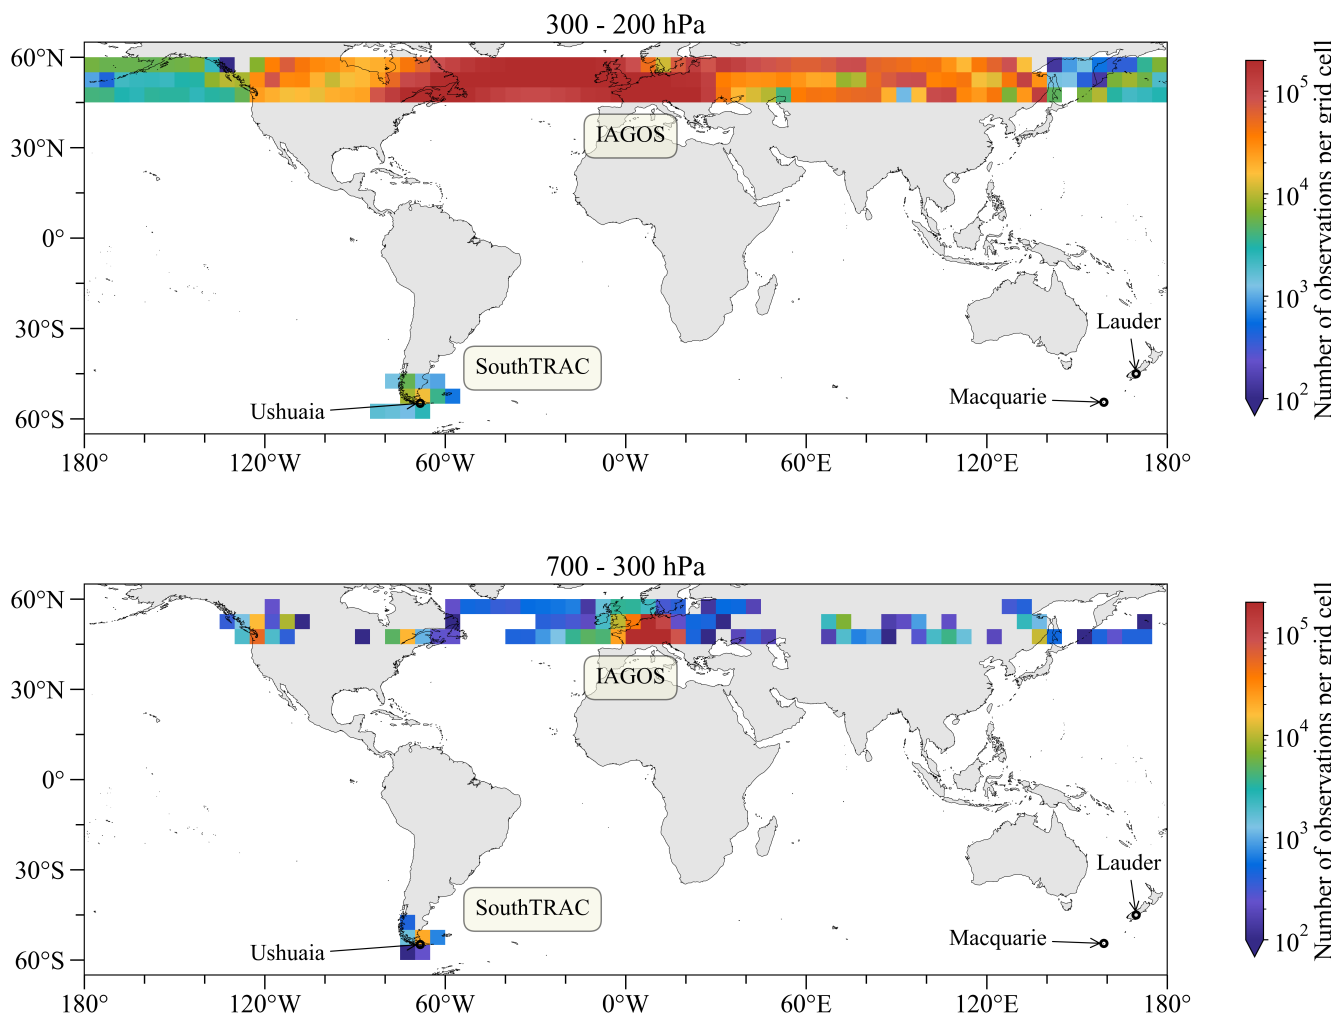

**Figure S1: Routes position frequency obtained from aircraft GPSs. All panels show only SouthTRAC and IAGOS data within the same latitudinal band 45°-60° in the SH and NH. The upper panel shows the number of GPS observations by grid cell (5° x 5°) between 200 and 300 hPa. The lower panels show the same information between 300 and 700 hPa.**

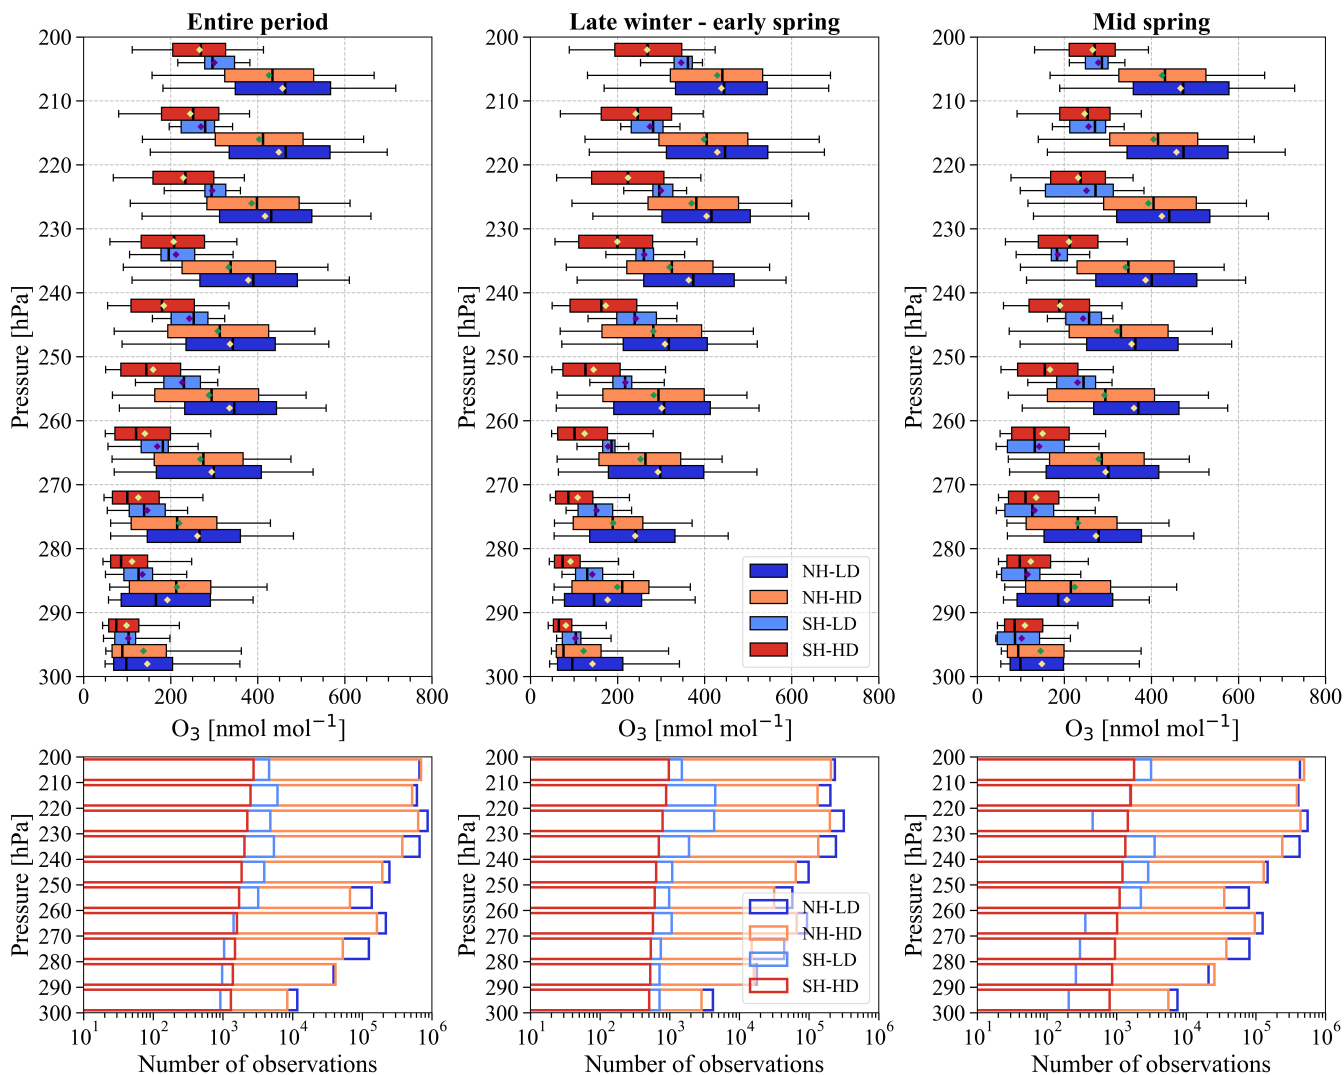

**Figure S2: Ozone box plot ( $\text{nmol mol}^{-1}$ ) and associated sample sizes by pressure bins. The plots include ozone data with RH less than 30% obtained from IAGOS, SouthTRAC and WOUDC. In the upper panel, the left, middle and right plots show the entire period, late winter-early spring and mid-spring respectively, for the northern and southern hemispheres and high-depleted (HD) and low-depleted (LD) years. Box plots indicate the median, the 25<sup>th</sup> and 75<sup>th</sup> percentiles. The diamonds in the upper panels indicate the mean values. The whiskers extend to the 5<sup>th</sup> and 95<sup>th</sup> percentiles. In the lower panels, the X-axis shows the observation numbers. The rest of the plot information is the same as described in the upper panel. High and low-depletion years in SH included ozonesondes launched from Ushuaia, Lauder and Macquarie Island.**

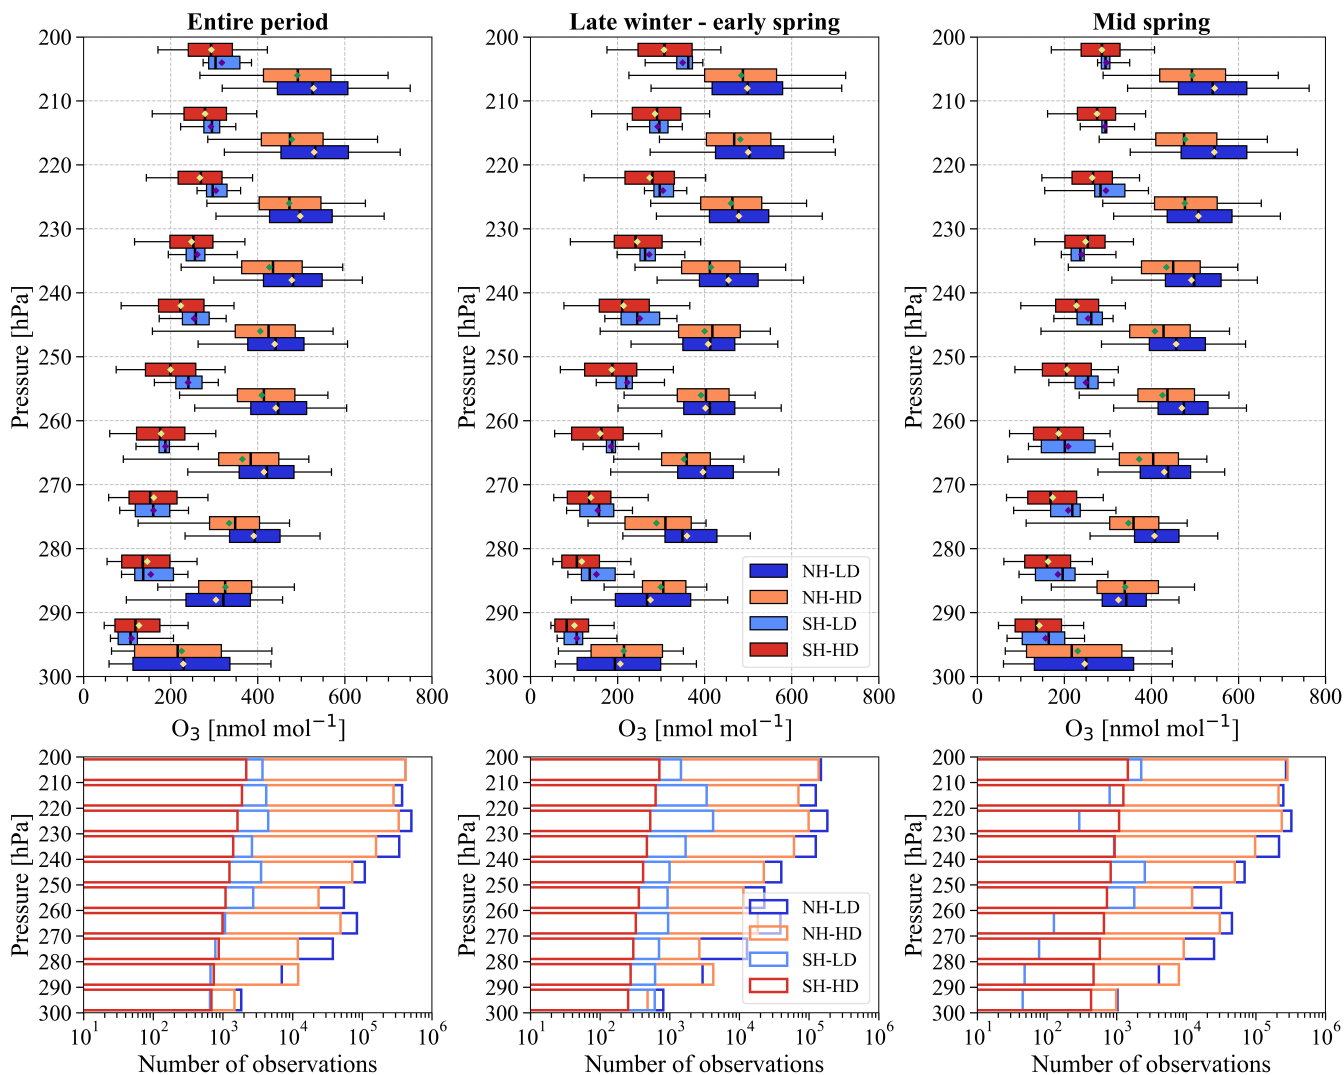

**Figure S3: Ozone box plot ( $\text{nmol mol}^{-1}$ ) and associated sample sizes by pressure bins. The plots include ozone data with RH less than 10% obtained from IAGOS, SouthTRAC and Woudc. In the upper panel, the left, middle and right plots show the entire period, late winter-early spring and mid-spring respectively, for the northern and southern hemispheres and high-depleted (HD) and low-depleted (LD) years. Box plots indicate the median, the 25<sup>th</sup> and 75<sup>th</sup> percentiles. The diamonds in the upper panels indicate the mean values. The whiskers extend to the 5<sup>th</sup> and 95<sup>th</sup> percentiles. In the lower panels, the X-axis shows the observation numbers. The rest of the plot information is the same as described in the upper panel. High and low-depletion years in SH included ozonesondes launched from Ushuaia, Lauder and Macquarie Island.**
